# Supplementary material
Source: Research Square preprint supplement (doi:10.21203/rs.3.rs-9141619/v1)
Supplement: Supplementary file 1 [file 1a5c4700cd79bdb301554b00.xlsx]

## Sheet: Sheet1
Survey	Reference	Methods	Locality	Year	Date	Team	Comments
#1	Wilkens et al., 1990	Iterative	Jameos del Agua	1980	1980-03-01	H. Wilkens	Only average values available. Raw information lost
#2	Wilkens et al., 1990	Iterative	Jameos del Agua	1983	1983-03-01	H. Wilkens	Only average values available. Raw information lost
#3	Wilkens et al., 1990	Iterative	Jameos del Agua	1984	1984-03-01	H. Wilkens	Only average values available. Raw information lost
#4	Wilkens et al., 1990	Iterative	Jameos del Agua	1986	1986-03-01	H. Wilkens	Only average values available. Raw information lost
#5	Wilkens et al., 1990	Iterative	Jameos del Agua	1989	1989-03-01	H. Wilkens	Only average values available. Raw information lost
#6	Nuñez & Brito, 2008	Transect	Cueva de los Lagos	1994	1994-04-01	J. Núñez, O. Ocaña	Management Plan Munidopsis polymorpha and Morlockia ondinae (GOBCAN)
#7	Jantschke et al., 1994	Transect, direct	Túnel de la Atlantida	1994	1994-04-01	C. Nohlen	Provided by Christine Nohlen
#8	Herrera & Espino, 2002	Photoquadrats	Jameos del Agua	2002	2002-05-01	R. Herrera	Evaluation of the conservation status of Munidopsis polymorpha (GOBCAN)
#9	Herrera & Espino, 2002	Transect	Cueva de los Lagos	2002	2002-07-01	R. Herrera, F. Espino	Management Plan Munidopsis polymorpha and Morlockia ondinae (GOBCAN)
#10	Herrera & Espino, 2002	Photoquadrats	Jameos del Agua	2002	2002-07-11	R. Herrera	Evaluation of the conservation status of Munidopsis polymorpha (GOBCAN)
#11	Herrera & Espino, 2002	Direct	Charcos de Luis	2002	2002-10-01	M. Arechavaleta	Management Plan Munidopsis polymorpha and Morlockia ondinae (GOBCAN)
#12	Herrera & Espino, 2002	Photoquadrats	Jameos del Agua	2002	2002-10-02	R. Herrera	Evaluation of the conservation status of Munidopsis polymorpha (GOBCAN)
#13	unpublished	Transect	Cueva de los Lagos	2006	2006-07-01	A. Martinez, A.M. Palmero, J. Nuñez, M.C. Brito	Beca de Investigación sobre Medio Ambiente, Ordenación del Territorio y Patrimonio Natural de Canarias
#14	unpublished	Direct	Charcos de Luis	2006	2006-07-01	A. Martinez, A.M. Palmero, J. Nuñez, M.C. Brito	Beca de Investigación sobre Medio Ambiente, Ordenación del Territorio y Patrimonio Natural de Canarias
#15	Nuñez & Brito, 2008	Transect, direct	Túnel de la Atlantida	2008	2008-05-01	A. Martínez, J. Nuñez, L.E. Cañadas, A. Lainez, J. Nuñez, L. Nuñez, M.C. Brito	Evaluation of the conservation status of Munidopsis polymorpha (GOBCAN)
#16	Nuñez & Brito, 2008	Transect	Cueva de los Lagos	2008	2008-05-01	A. Martínez, L.E. Cañadas, A. Lainez	Evaluation of the conservation status of Munidopsis polymorpha (GOBCAN)
#17	Nuñez & Brito, 2008	Direct	Charcos de Luis	2008	2008-05-01	A. Martinez, J. Nuñez, J.R. Docoito	Evaluation of the conservation status of Munidopsis polymorpha (GOBCAN)
#18	unpublished	Photoquadrats	Jameos del Agua	2015	2015-03-12	R. Herrera	Evaluation of the conservation status of Munidopsis polymorpha (GOBCAN)
#19	unpublished	Iterative	Jameos del Agua	2017	2017-03-01	H. Wilkens	Management Plan Munidopsis polymorpha and Morlockia ondinae (GOBCAN)
#20	unpublished	Iterative	Jameos del Agua	2017	2017-04-01	A. Martínez, G. García-Gomez, A. Garcia-Herrero, E. Dominguez, C. D. Jorge	Management Plan Munidopsis polymorpha and Morlockia ondinae (GOBCAN)
#21	unpublished	Transect, direct	Túnel de la Atlantida	2017	2017-04-01	A. Martínez, T. Martín, J. Valenciano, E. Domínguez, C. D. Jorge	Management Plan Munidopsis polymorpha and Morlockia ondinae (GOBCAN)
#22	unpublished	Transect, direct	Túnel de la Atlantida	2017	2017-04-01	A. Martínez, T. Martin, J. Valenciano, E. Dominguez, C. D. Jorge	Management Plan Munidopsis polymorpha and Morlockia ondinae (GOBCAN)
#23	unpublished	Photoquadrats	Jameos del Agua	2017	2017-04-13	E. Domínguez	Management Plan Munidopsis polymorpha and Morlockia ondinae (GOBCAN)
#24	unpublished	Transect, direct	Túnel de la Atlantida	2023	2023-02-01	A. Roldán & Liquid Planet Team	Secuenciacion del genoma de las especies protegidas Munidopsis polymorpha y Morlockia ondinae (R. Fernandez)
#25	unpublished	Photoquadrats	Jameos del Agua	2024	2024-03-01	A. Martinez	Re-evaluation on the conservation status of Munidopsis polymorpha and Morlockia ondinae (MITECO)
#26	unpublished	Transect, direct	Túnel de la Atlantida	2024	2024-03-01	A. Roldán & Liquid Planet Team	Re-evaluation on the conservation status of Munidopsis polymorpha and Morlockia ondinae (MITECO)
#27	unpublished	Photoquadrats	Jameos del Agua	2024	2024-05-01	C. Camacho	Re-evaluation on the conservation status of Munidopsis polymorpha and Morlockia ondinae (MITECO)
#28	unpublished	Transect, direct	Túnel de la Atlantida	2024	2024-05-01	A. Roldán & Liquid Planet Team	Re-evaluation on the conservation status of Munidopsis polymorpha and Morlockia ondinae (MITECO)
#29	unpublished	Iterative	Jameos del Agua	2024	2024-07-01	A. Martinez, M. Garcia-Cobo, Z. Fresno-Lopez, S. Boulamail	Re-evaluation on the conservation status of Munidopsis polymorpha and Morlockia ondinae (MITECO)
#30	unpublished	Transect, direct	Túnel de la Atlantida	2024	2024-07-01	A. Roldán & Liquid Planet Team	Re-evaluation on the conservation status of Munidopsis polymorpha and Morlockia ondinae (MITECO)
#31	unpublished	Photoquadrats	Jameos del Agua	2024	2024-08-01	C. Camacho	Re-evaluation on the conservation status of Munidopsis polymorpha and Morlockia ondinae (MITECO)
#32	unpublished	Iterative	Jameos del Agua	2024	2024-11-01	A. Martinez, G. Garcia-Gomez, M. Garcia-Cobo, S. Boulamail, M.K. Neunschwander	Re-evaluation on the conservation status of Munidopsis polymorpha and Morlockia ondinae (MITECO)
#33	unpublished	Photoquadrats	Jameos del Agua	2024	2024-11-01	C. Camacho	Re-evaluation on the conservation status of Munidopsis polymorpha and Morlockia ondinae (MITECO)
#34	unpublished	Transect, direct	Túnel de la Atlantida	2024	2024-11-01	A. Roldán & Liquid Planet Team	Re-evaluation on the conservation status of Munidopsis polymorpha and Morlockia ondinae (MITECO)
#35	unpublished	Iterative	Jameos del Agua	2025	2025-05-01	A. Martinez, M. Maranzano, C. Camacho	Re-evaluation on the conservation status of Munidopsis polymorpha and Morlockia ondinae (MITECO)
