# Supplementary material
Source: Research Square preprint supplement (doi:10.21203/rs.3.rs-9141619/v1)
Supplement: Supplementary file 1 [file 9fda9df169a0469ff166b27d.docx]

**Supplementary Information 1.** Description of each locality and additional details on the sampling methods.

**Cueva de los Lagos** is the anchialine locality furthest from the coast within the La Corona lava tube. The description of the locality is based on the unpublished cartography by G.E. Uesteyaide. The total cave 3D spatial development is 856 m (i.e. length considering slopes) and the vertical range is 46 m from the entrance. Its entrance, a 12 m deep *jameo* protected by a gate, is located about 600 m from the coastline and 210 m southwest of the road LZ-201 (Wilkens et al., 2009; Martínez et al., 2016). The first section of lava tube extends above sea level, while the last 417 m reach the phreatic level. The initial section of the phreatic level is partially flooded (1-2 m deep) and divided into three lakes separated by sumps. Lake 1 (*lago 1*) is approximately 85 m long, and it is connected by a 20 m sump to 112-m-long lake 2 (*lago 2).* The cave ends with lake 3 (*lago 3*), 50 m long, that is only fully separated from lake 2 during high tide by an overhand. The third lake ends in a fully flooded sump (*sifón*), which is approximately 150 m long and between 5-9 m deep—although this section remains unmapped. The campaigns performed in this locality are summarized in Table S1.

**Túnel de la Atlántida** is the section of the closest section of La Corona to the coast, extending approximately 1,726 m from Los Jameos del Agua towards the sea, and then running further beneath the seafloor inside the island building in a southeastward direction. The description of this section is here updated based on recent cave diving surveys (Lario, 2022). The cave begins at a 3 x 8 m phreatic lake southeast of Jameo Chico. The first 400 m of the cave are partially obstructed by two restrictions: the first, the Sima, at 150 m from the entrance, is a steep descent where the cave drops from 15 m to 25-30 m deep. The second, at 350-400 m from the entrance, is a ceiling collapse. Another important site within the lava tube is the Montaña de Arena (meaning ‘sand mountain’), a 25 m high dune composed of external organogenic sediments. From here, the cave widens and deepens progressively until it reaches 64 m at 1,726 m, ending in a fossil dune. Near the entrance, a secondary upper gallery, or Lago Escondido, extends about 200 m. The water of Túnel de la Atlántida is saline, oxygenated, and subject to slight tidal fluctuations that affect hydrological parameters (Wilkens et al. 2009). Organic matter content varies due to influxes of plant debris and algae from outside, which increases productivity (Martínez and Brankovits, unpublished data).

The population of *Munidopsis polymorpha* and *Morlockia* spp. were using different methodologies depending on the cave section. The population at the entrance of the cave was directly counted by an external observer, on the set of rocks that are visible from outside the water, totaling a surface of 400 m2. The population in the cave’s twilight section (1-30 m from the entrance), was counted in a transect at 10-m interval using a marked reference line (Jantschke et al., 1994; Supplementary Information 2). Abundances of *Munidopsis polymorpha* and *Morlockia* spp. the dark section of the cave (30 m from the entrance to Montaña de Arena), were counted directly by cave rebreathers, divers equipped with scooters, who swim in 2-persons-teams covering the entire cave floor. Finally, abundances at Montaña de Arena were counted by two divers equipped with rebreathers and scooters. At each side of the dune, each diver performed an upward transect from the base of the dune to the summit, and then along the walls, counting all visible individuals. Divers annotated the position of all observed individuals in relation to known cave features. The campaigns performed in this locality, along with the teams and methodologies employed are summarized in Table S1.

**Los Jameos del Agua anchialine pool** is a 50 m long, 25 m wide, and 10 m deep lagoon is illuminated by three skylights and is part of Los Jameos del Agua Center for Art and Culture. The pool is separated from the rest of the cave by two collapses where visitor infrastructures have been built. Despite modifications during construction of the complex, the pool retains its original dimensions and features. At its nearest point to the sea, a staircase descends into the lagoon, reaching 9-10 m deep, which gradually shallows to the west. The substrate includes pumice that forms flat areas at depths of 4-5 m and 0.5-1 m, the latter near a dance floor that is part of the Center for Art and Culture. The water is saline, well-oxygenated, and partially illuminated. Its level changes by about 1.5 m with the tidal cycle, with a 1.5-hour delay. The faint light allows for diatom growth on the pumice surfaces, and the lagoon receives some carbon input from the surrounding soil and the sea. This site has the highest concentrations of *Munidopsis polymorpha*, whereas *Morlockia* spp. has only been sighted once. The campaigns performed in this locality, along with the teams and methodologies employed are summarized in Table S1.

We performed photographic counts based on a method used for benthic studies in the Canary Islands (Carrillo and Cruz, 1992) and modified by Rogelio Herrera and Fernando Espino for counting this species (Espino and Herrera, 2002b). The method involves photographing random areas of the bottom of Los Jameos del Agua pool using a reflex camera mounted on a 1-meter aluminum rod, which rests on the substrate to maintain the focal distance, obtaining photographs of an approximate surface area that depends on the focal distance of the cave. Each photograph was taken in separated points so it can be considered as an independent sample that can be used to estimate the number of individuals, as well as the presence of other elements that may affect their density (e.g., substrate type, accompanying fauna, or coins thrown into the lagoon by tourists), after normalizing the counts using the camera’s focal distance (Supplementary Material).

Given the high densities of *Munidopsis polymorpha,* and the impossibility of performing capture-recapture estimation methods, we adopted two different strategies to estimate the status of the population. Firstly, we adopted the methods introduced by Wilkens and collaborators in the 80s, which consists of counting the number of *Munidopsis polymorpha* individuals on pre-established rocks of ca. 0.25 cm² surface each 15 minutes between 16:30 and 21:45 (Wilkens et al., 1990). A set of rocks was established in the eastern end of the lake, near Jameo Chico, and another set in the western area, towards Jameo Grande, including the set originally defined by Horst Wilkens (1980-1989; c3 and g4) and those added during the more recent studies (Figure S1; see Material and Methods of the manuscript). Raw data obtained from iterative counting is summarized in Table S4.

**Charcos de Luis anchialine pools** is an anchialine pool complex situated at the northeastern tip of Malpaís de la Corona, next to the road LZ-1 and near Caleta del Mojón. The low terrain elevation and porous volcanic scoria allow groundwater to surface in the area, forming two permanent anchialine pools, whose surface and depth varies with the tides. Pool 1, to the west, is 25 m² and 0.5-1.5 m deep at high tide, with a scoria-block substrate and sediment and decaying vegetation along the edges, supporting abundant anemones. Pool 2 is larger (49 m²) but shallower (0.5-1 m at high tide), with mostly cyanobacteria, some anemones, and many encrusting serpulid annelids. Additionally, several small depressions allow the emergence of groundwater at high tide, such as *el Agujero* (the hole), situated between Pool 1 and Pool 2.

Counting in this area was done visually, with two independent observers searching for *Munidopsis polymorpha* over 15 minutes in each pool.

**Supplementary information 2. Detailed explanation of the AR1**

Because observations within a same-day series are temporally ordered, and thus, their errors are not independent (adjacent residual tend to be similar), we also implemented the bam’s AR(1) option to account for such a first-order autoregressive error structure, via the parameter rho. Practically, we first fit a base negative-binomial model with the structure described above, using the function ‘gam’ in ‘mgcv’. From this base model, we computed Pearson residuals and, within each series, we calculated the lag-1 correlation; then, we used it to calculate the ‘rho’ estimator as the median of the series-specific​ values, truncated to [0.01,0.95] to avoid degenerate values. In the final model, calculated with the same structure and the based model but using the function ‘bam’ in ‘mgcv’, we supply the rho value previously estimated (via the option ‘rho’), as well as a logical vector that flags the first count of each temporal series (via option ‘AR.start’), so the correlation chain restarts at the beginning of every same-day run.

**Supplementary information 3. Counting methods in Túnel de la Atlántida twilight section.**

Abundances of *Munidopsis polymorpha* in the twilight section of Túnel de la Atlántida were quantified following the general survey design and analytical framework described in the main Materials and Methods. Here we provide additional details specific to the adapted methodology used for this cave sector.

The twilight section corresponds to the shallow flooded portion of the tunnel extending from 1 to 30 m penetration from the entrance, encompassing sections 1–5 m, 10–20 m, and 20–30 m. This section receives attenuated artificial illumination and represents a transitional environment between the entrance pool and the fully dark cave passages. Abundances in this sector were estimated using dedicated SCUBA transects conducted exclusively for counting purposes, as routine access to this area for equipment checks would otherwise cause repeated disturbance to the animals.

During each dedicated survey, a pair of experienced cave divers progressed slowly along the tunnel, one on each flank, to maximize detectability while minimizing disturbance. Counts were recorded by distance-based section, and the surveyed effort was quantified as the cumulative linear distance (meters) covered within the twilight section. Abundances were subsequently standardized as individuals per linear meter using a log(distance) offset, consistent with the approach described for other transect-based surveys.

Twilight section counts were analysed using generalized additive models (GAMs) as described in the main Materials and Methods. Analyses were restricted to snapshot surveys conducted in 1994 and 2017 and considered only observations within the 1–30 m twilight section. Models assumed negative binomial errors with a log link, incorporated sampling effort as a log-offset, and were fitted using restricted maximum likelihood (REML).

To assess the relative importance of environmental drivers, we compared alternative GAM formulations including (i) tidal covariates only, (ii) light-related covariates only, and (iii) both sets of covariates, following the same model selection strategy based on AIC and BIC used elsewhere in the study. Cyclic effects of tidal and solar phase were modelled using cyclic cubic regression splines were supported by the data, with unsupported smooths penalized to zero (select = TRUE). Long-term change was represented by a centered continuous year covariate.

Model comparison based on AIC and BIC consistently favored light-based models over tide-based or combined models (ΔAIC > 1.5), indicating that short-term variation in twilight-section abundance was better explained by sunlight-related covariates than by tidal forcing (Table S2).

In the best-supported model, a significant negative temporal trend in abundance was detected between 1994 and 2017 (p < 0.01), after accounting for sampling effort and environmental covariates. In contrast, the cyclic smooth for solar phase was strongly penalized and effectively reduced to zero, indicating no detectable within-day cyclic pattern in abundance at the temporal resolution of the surveys. Day length showed a positive but non-significant effect. Model diagnostics indicated adequate fit, no residual patterns, and no evidence of unmodelled non-linearity or overdispersion.

Overall, these results indicate a long-term decline in *M. polymorpha* abundance in shallow cave sectors, while short-term diel modulation in the twilight section appears weak or absent relative to longer-term temporal change.

**Supplementary figures**

**Figure S1. Position of the rocks used for iterative counting.** A. Map of Los Jameos del Agua pool. The upper end faced Jameo Chico (lava tube downstream) and the lower end Jameo Grande (lava tube upstream). The rocks are flagged as ‘c1’-’c3’ and ‘g1’-’g4’. B. Original diagram of the downstream end of Los Jameos del Agua pool, showing the position of the rocks used for counting in the 1980s. The rocks are called using the same nomenclature. Noticed that, at the time, only rock ‘c3’ was used for counting. C. Same for the upstream shore of the lake, showing only the position of rock ‘g4’. D. Downstream end of Los Jameos del Agua pool in 2024, showing the current position of the rocks, taken from the beginning of the sidewalk built for the visitors. E. Upstream end of Los Jameos del Agua pool in 2024, showing the current position of rocks, taken from the stairs leading to the lake, next to the dance floor.

**Figure S2.** Raw abundances of *Munidopsis polymorpha* along the first 150 m of Túnel de la Atlántida, focusing on the entrance and twilight sections. Points represent counts recorded during individual sampling events. Observations from the same event are connected by coloured lines. The dark line represents a smoothed trend of abundance along the distance gradient, and the shaded band indicates the associated 95% confidence interval. Abundance declines with increasing distance from the entrance, with the highest values recorded at the entrance and the lowest in deeper sections approaching the dark section.

**Figure S3.** Changes in temperature measured in the entrance of Túnel de la Atlántida between November 2022 and December 2025, showing a yearly increase in temperature of 0.041 °C. Data recorded by Proyecto Sublantida, using a Tinytag Aquatic 2 Data Logger placed at 4 m depth.

**Supplementary Tables**

**Table S1.** Summary of the sampling campaigns.

**Table S2.** Results of the generalized additive model describing abundances of Munidopsis polymorpha in the twilight section of Túnel de la Atlántida

**Table S3.** Summary of the model selection for the abundances of jameíto estimated using iterative counts in Los Jameos del Agua including the data collected between 2017-2025. Model of abundances between 1980-2025 include sunlight effects only due to the nature of the data (see Material and methods). Degree of freedom (df), and values for the Akaike (AIC) and Bayesian (BIC) information criteria are summarized. Best values are highlighted in bold.

**Table S4.** Results of the generalized additive model (GAM) describing short-term fluctuations in *Munidopsis polymorpha* abundance in Los Jameos del Agua based on iterative counting time series from 1980-2025. The model includes solar incidence, spatial position within the cave (Jameo Grande vs. Jameo Chico, reference), and temporal trend (Year), while accounting for repeated high-frequency observations through a random smooth of counting series. Parametric coefficients are reported with estimates, standard errors, z values, and p values. Smooth terms are summarized by estimated degrees of freedom (edf), reference degrees of freedom (Ref df), Chi-square statistics, and p values. Model fit is indicated by adjusted R² and percentage of deviance explained.
