# Supplementary material
Source: Research Square preprint supplement (doi:10.21203/rs.3.rs-9141619/v1)
Supplement: Supplementary file 2 [file 730fccd09353066334f22e8d.xlsx]

## Sheet: Sheet1
		df	AIC	BIC
	Tidal	5.00018	72.334	72.7313
	Solar	4.00007	69.1838	69.5015
	Combined	7.20334	70.1642	70.7365
