# Supplementary material
Source: Research Square preprint supplement (doi:10.21203/rs.3.rs-9141619/v1)
Supplement: Supplementary file 4 [file b1b6519f479df98e87e37375.xlsx]

## Sheet: Sheet1
Jameos del Agua (Solar, R-sq.(adj) = 0.797; Dev. = 75.8%)
	Estimate	Std Error	z value	p value
(Intercept)	3.06357	0.138702	22.087	<2.00E-16
Sun position (day)	-0.190711	0.068899	-2.768	0.00591
Position (Jameo grande)	-1.13983	0.189057	-6.029	3.82e-09
Year	-0.015807	0.005519	-2.864	0.00441
	Est df	Ref df	Chi sq	p value
s(sun phase)	3.124	4	13.94	0.987
s(day length)	2.657e-05	9	0	1
s(series)	29.18	35	25.9	5.41e-06
	df	AIC	BIC
Tidal	72.4318	4593.7	4925.48
Solar	75.6918	4276.77	4623.49
Combined	80.1274	4227.92	4594.96
